# Supplementary material for: Beyond the HLA polymorphism: a complex pattern of genetic susceptibility to pemphigus
Source: PubMed Central journal article supplement (PMC7341728; doi:10.1590/1678-4685-gmb-2019-0369), 2020-07-01
Supplement: 1415-4757-GMB-43-3-e20190369-s2.pdf [file 1415-4757-GMB-43-3-e20190369-s2.pdf]

**Supplementary Material to "Beyond the HLA polymorphism: a complex pattern of genetic susceptibility to pemphigus"**

**Table S2** - HLA class II associations described for pemphigus foliaceus in different populations

| Gene                                               | Susceptibility                                                                             | OR or RR                                                                                                                                                                 | P value                                                              | Protective                                                                                                  | OR or RR                                                                                                                                  | P value                                                         | Comment                                                                                                                                                                                                                                                                                                                                                                                                                                                                   | Method                  | Population                                             | Sample                        | Reference                                                                                                                                                                                               |
|----------------------------------------------------|--------------------------------------------------------------------------------------------|--------------------------------------------------------------------------------------------------------------------------------------------------------------------------|----------------------------------------------------------------------|-------------------------------------------------------------------------------------------------------------|-------------------------------------------------------------------------------------------------------------------------------------------|-----------------------------------------------------------------|---------------------------------------------------------------------------------------------------------------------------------------------------------------------------------------------------------------------------------------------------------------------------------------------------------------------------------------------------------------------------------------------------------------------------------------------------------------------------|-------------------------|--------------------------------------------------------|-------------------------------|---------------------------------------------------------------------------------------------------------------------------------------------------------------------------------------------------------|
| HLA-DR individuals with the antigen (allele group) | DR1(DRB1*01), DR4(DRB1*04)                                                                 | 6.4, 3.3                                                                                                                                                                 | 0.00007, 0.003                                                       | DR7(DRB1*07)                                                                                                | 0.06                                                                                                                                      | 0.00019                                                         | 95% CI not informed. In parenthesis: actual nomenclature of DR and DQ allele groups                                                                                                                                                                                                                                                                                                                                                                                       | microlymphocytotoxicity | Brazilian (admixed of predominantly European Ancestry) | PF(FS): 48, C: 74 (matched)   | Petzl-Erler ML, Santamaria J. Are HLA class II genes controlling susceptibility and resistance to Brazilian pemphigus foliaceus (fogo selvagem)? Tissue Antigens. 1989 Mar;33(3):408-14.                |
| HLA-DQ individuals with the antigen (allele group) | DQ1(DQB1*05:01)                                                                            | 3.2                                                                                                                                                                      | 0.018                                                                | DQ2(DQB1*02)                                                                                                | 0.27                                                                                                                                      | 0.0081                                                          |                                                                                                                                                                                                                                                                                                                                                                                                                                                                           |                         |                                                        |                               |                                                                                                                                                                                                         |
| HLA-DR-DQ haplotypes                               | DR1-DQ1(01-05:01), DR4-DQ3(04-03:02)                                                       | na                                                                                                                                                                       | na                                                                   | DR7-DQ2(07-01), DR3-DQ2(03-02)                                                                              | na                                                                                                                                        | na                                                              |                                                                                                                                                                                                                                                                                                                                                                                                                                                                           |                         |                                                        |                               |                                                                                                                                                                                                         |
| HLA-DRB1 individuals with the allele               | DRB1*01, 01:01, 01:02, 01:03, 04, 04:04, 04:06, 04:10, 14:06, 16:01                        | 7.40(4.77-11.47), 1.83(1.08-3.12), 10.36(5.92-18.13), 5.41(1.27-22.95), 2.66(1.72-4.11), 4.58(2.16-9.72), 35.85(nd), 9.62(0.99-93.35), 4.04(1.07-15.30), 2.87(1.29-6.37) | <10-6, 0.042; <10-6; 0.025; <10-6, 0.0004 0.0005 0.046, 0.044, 0.017 | DRB1*03:01, 07:01, 08, 08:01, 11, 11:01, 11:04, 14:02, 15                                                   | 0.23(0.09-0.59), 0.09(0.03-0.30), 0.27(0.11-0.64), 0.07(nd), 0.09(0.03-0.28), 0.05(0.01-0.40), 0.15(0.02-1.13), 0.09(nd), 0.51(0.30-0.89) | 0.0009, <10-6, 0.0011, 0.007, <10-6, <10-6, 0.037, 0.018, 0.019 | Interactions between susceptibility (SU), protective (PR) and neutral (NE) alleles: Protection is dominant, since the PR/NE and PR/PR genotypes are both equally (P=0.95) and strongly protective (OR=0.07 and 0.05, respectively; P<10-6 for both). Risk of SU/SU genotype is higher (P=0.012) than for SU/NE (OR=8.7 and 4.0; P<10-6), For the SU/PR genotype the OR does not differ statistically from 1, consistent with lack of dominance between PR and SU alleles. | PCR-SSO                 | Brazilian (admixed of predominantly European Ancestry) | PF(FS): 128, C: 402 (matched) | Pavoni DP, Roxo VM, Marquart Filho A, Petzl-Erler ML. Dissecting the associations of endemic pemphigus foliaceus (Fogo Selvagem) with HLA-DRB1 alleles and genotypes. Genes Immun. 2003 Mar;4(2):110-6. |
| HLA-DQA1 individuals with the allele               | DQA1*01:01, 01:03                                                                          | 4.72(2.78-8.03)                                                                                                                                                          | <10-5                                                                | DQA1*01:03, 02:01, 05:01                                                                                    | 0.14 (0.03-0.61), 0.07(0.02-0.28), 0.31(0.17-0.58)                                                                                        | 0.002, <10-5, <10-5                                             |                                                                                                                                                                                                                                                                                                                                                                                                                                                                           | PCR-SSO                 | Brazilian (admixed of predominantly European Ancestry) | PF(FS): 104; C: 162 (matched) | Petzl-Erler and Roxo, unpublished data                                                                                                                                                                  |
| HLA-DQB1 individuals with the allele               | DQB1*05, 05:01                                                                             | 6.63(3.72-11.83), 5.61(3.21-9.83)                                                                                                                                        | <10-5, <10-5                                                         | DQB1*02, 03:01, 06                                                                                          | 0.12(0.05-0.29), 0.46(0.26-0.84), 0.54(0.31-0.96)                                                                                         | <10-5, 0.012, 0.0034                                            |                                                                                                                                                                                                                                                                                                                                                                                                                                                                           |                         |                                                        |                               |                                                                                                                                                                                                         |
| HLA-DRB1-DQA1-DQB1 haplotypes                      | 01:02-01:01-05:01, 04:04-03-03:02, 04:06-03:01-03:02, 14:06-05:01-03:01, 16:01-01:02-05:02 | na                                                                                                                                                                       | na                                                                   | 03:01-05:01-02:01, 07:01-02:01-02, 08:01-04:01-04:02, 11:01or11:04-05:01-03:01, 14:02-05:01-03:01, 15-01-06 | na                                                                                                                                        | na                                                              |                                                                                                                                                                                                                                                                                                                                                                                                                                                                           |                         |                                                        |                               |                                                                                                                                                                                                         |
| HLA-DRB1                                           | DRB1*01:01, 01:02, 04                                                                      | 2.83(1.88-4.28), 6.06(4.32-8.49), 12.70(8.16-19.76)                                                                                                                      | 0.0001, 5x10-10, <0.0001                                             | DRB1*07:01, 11:01, 13:01                                                                                    | 0.30(0.13-0.68), 0.07(0.01-0.50), 0.20(0.06-0.62)                                                                                         | 0.024, 0.027, 0.027                                             | Susceptibility: group DRB1*01, protective groups: DRB1*07, 11 and 13                                                                                                                                                                                                                                                                                                                                                                                                      | PCR-SSP                 | Brazilian (admixed of predominantly European Ancestry) | PF: 86, C: 1592 (BMT donors)  | Brochado MJF, Nascimento DF, Deghaide NHS, Donadi EA, Roselino AM. Data on HLA class I/II profile in Brazilian pemphigus                                                                                |

| Gene                                 | Susceptibility               | OR or RR                                                | P value                      | Protective                   | OR or RR                            | P value                      | Comment                                                                                                                                                                                                                                                                                                                                                | Method  | Population                                             | Sample                       | Reference                                                                                                                                                                                                                                                                                                                                      |
|--------------------------------------|------------------------------|---------------------------------------------------------|------------------------------|------------------------------|-------------------------------------|------------------------------|--------------------------------------------------------------------------------------------------------------------------------------------------------------------------------------------------------------------------------------------------------------------------------------------------------------------------------------------------------|---------|--------------------------------------------------------|------------------------------|------------------------------------------------------------------------------------------------------------------------------------------------------------------------------------------------------------------------------------------------------------------------------------------------------------------------------------------------|
| HLA-DQA1                             | DQA1*01, 01:02, 03           | 0.03(0.01-0.08),<br>1.41(1.16-1.69),<br>1.77(1.23-2.54) | 0.02, 0.01,<br>0.0019        | DQA1*02:01, 05               | 0.34(0.15-0.75),<br>0.30(0.18-0.49) | 0.03,<br><0.0001             |                                                                                                                                                                                                                                                                                                                                                        |         |                                                        |                              | patients. Data Brief. 2016 Jun 3;8:364-74.                                                                                                                                                                                                                                                                                                     |
| HLA-DQB1                             | DQB1*05:01                   | 2.95                                                    | 3x10-10                      | DQB1*03:01, 06:03            | 0.39, 0.22                          | 0.0002, 0.02                 | 95% CI not informed.                                                                                                                                                                                                                                                                                                                                   |         |                                                        |                              |                                                                                                                                                                                                                                                                                                                                                |
| HLA-DRB1-DQA1-DQB1 haplotypes        | 04-03-04, 01-01-05, 16-01-05 | 6.2, 4.2, 2.8                                           | 0.0001,<br>0.0001,<br>0.0023 | 11-05-03, 13-01-06, 07-02-02 | 0.13, 0.15, 0.29                    | 6x10-8,<br>7x10-7,<br>0.0055 | 95% CI not informed.                                                                                                                                                                                                                                                                                                                                   | PCR-SSP | Brazilian (admixed of predominantly European Ancestry) | PF: 86, C: 1592 (BMT donors) | Brochado MJF, Nascimento DF, Deghaide NHS, Donadi EA, Roselino AM. Data on HLA class I/II profile in Brazilian pemphigus patients. Data Brief. 2016 Jun 3;8:364-74.                                                                                                                                                                            |
| HLA-DRB1 individuals with the allele | DRB1:01(01:01+01:02), 16:01  | 4.63(1.74-12.34),<br>8.57(0.98-75.18)                   | 0.0017,<br>0.0418            | DRB1*15                      | 0.19(0.04-0.96)                     | 0.054                        | Frequencies of the non-associated DRB1, DQA1 and DQB1 alleles and allele groups were not informed. OR and P calculated on basis of the data presented in the manuscript. The p-values for DRB1*15 and 16:01 are borderline. DRB1*04:04 is non-significantly increased among patients (OR=2.22, p=0.23)                                                 | PCR-SSO | Brazilian (admixed)                                    | PF(FS): 34; C: 41 (matched)  | Moraes ME, Fernandez-Vina M, Lazaro A, Diaz LA, Filho GH, Friedman H, Rivitti E, Aoki V, Stastny P, Moraes JR. An epitope in the third hypervariable region of the DRB1 gene is involved in the susceptibility to endemic pemphigus foliaceus (fogo selvagem) in three different Brazilian populations. Tissue Antigens. 1997 Jan;49(1):35-40. |
| HLA-DRB1 individuals with the allele | DRB1*04:04                   | 9.60(2.30-40.11)                                        | 0.0026                       | DRB1*04:07, 08:02            | na, 0.13(0.02-1.08)                 | 0.0345,<br>0.0403            | OR and P for DRB1*08:02 and 04:07 calculated on basis of the data presented in the manuscript. DRB1*14:02 was not significantly increased among patients (OR=3.79, p=0.104; haplotype 14:02-05:01-03:01). Neutral allele: 16:02 (OR=1, p=0.74)                                                                                                         | PCR-SSO | Xavante Amerindians                                    | PF(FS): 10; C: 74 (matched)  | Cerna M, Fernandez-Viña M, Friedman H, Moraes JR, Moraes ME, Diaz L, Stastny P. Genetic markers for susceptibility to endemic Brazilian pemphigus foliaceus (Fogo Selvagem) in Xavante Indians. Tissue Antigens. 1993 Sep;42(3):138-40.                                                                                                        |
| HLA-DRB1-DQA1-DQB1 haplotypes        | 04:04-03-03:02               | na                                                      | na                           | 08:02-04:01-04:02            | na                                  | na                           |                                                                                                                                                                                                                                                                                                                                                        |         |                                                        |                              |                                                                                                                                                                                                                                                                                                                                                |
| HLA-DRB1 individuals with the allele | DRB1*04:04                   | 6.12(2.07-18.02)                                        | 0.0014                       | none                         |                                     |                              | OR and P calculated on basis of the data presented in the manuscript. Haplotype 14:02-03:01 was non-significantly increased among patients (OR=2.72, p=0.079). Haplotype 08:02-04:02 was non-significantly decreased among patients (OR=0.24, p=0.082). Neutral DRB1-DQB1 haplotypes (OR=1, p>0.57) 04:07-03:02, 04:11-03:02, 14:06-03:01, 16:02-03:01 | PCR-SSO | Terena Amerindians                                     | PF(FS): 20; C: 66 (matched)  | Moraes ME, Fernandez-Vina M, Lazaro A, Diaz LA, Filho GH, Friedman H, Rivitti E, Aoki V, Stastny P, Moraes JR. An epitope in the third hypervariable region of the DRB1 gene is involved in the susceptibility to endemic pemphigus foliaceus (fogo selvagem) in three different Brazilian populations. Tissue Antigens. 1997 Jan;49(1):35-40. |
| HLA-DRB1-DQB1 haplotypes             | 04:04-03:02                  | na                                                      | na                           |                              |                                     |                              |                                                                                                                                                                                                                                                                                                                                                        |         |                                                        |                              |                                                                                                                                                                                                                                                                                                                                                |
| HLA-DRB1 allele frequencies          | DRB1*04:02, 13:02, 14:01     | 7.0, 13.6, 21.64                                        | 0.038,<br>0.0015,<br>0.009   | [DRB1*11 absent in patients] |                                     | ns                           | 95% CI not informed. DRB1*01: 8.8% in P, 9.5% in C, no high resolution; DRB1*07 8.8% in P, 8.4% in C, 08: 2.9% in P, 6.5% in C, 11: 0% in P, 10.4% in C                                                                                                                                                                                                | PCR-SSO | Venezuelan (admixed)                                   | PF: 17; C: 101               | Sáenz-Cantele AM, Fernández-Mestre M, Montagnani S, Calebotta A, Balbas O, Layrisse Z. HLA-DRB1*0402 haplotypes without DQB1*0302 in Venezuelan patients with pemphigus vulgaris. Tissue Antigens. 2007 Apr;69(4):318-25.                                                                                                                      |
| HLA-DQB1 allele frequencies          | DQB1*05:03                   | 3.32                                                    | 0.05                         | DQB1*03:01                   | 0.16                                | 0.007                        | 95% CI not informed. DQB1*02: 11.7% in P, 14.4% in C                                                                                                                                                                                                                                                                                                   |         |                                                        |                              |                                                                                                                                                                                                                                                                                                                                                |
| HLA-DRB1 individuals with the allele | DRB1*03, 04                  | 3.25, 3.00                                              | 0.00048,<br>0.0007           | DRB1*11, 15                  | 0.07, 0.09                          | 0.01, 0.04                   | 95% CI not informed. DRB1*13 was non-significantly decreased among patients (OR=0.33, p=0.09). Only for groups DRB1*03 and 04 high resolution typing was informed.                                                                                                                                                                                     | PCR-SSP | Tunisian (south)                                       | PF(endemic): 50; C: 130      | Abida O, Zitouni M, Kallel-Sellami M, Mahfoudh N, Kammoun A, Ben Ayed M, Masmoudi A, Mokni M, Fezzaa B, Ben Osman A, Kammoun MR, Turki H, Makni H, Gilbert D, Joly                                                                                                                                                                             |

| Gene                                 | Susceptibility                          | OR or RR                             | P value                               | Protective           | OR or RR   | P value      | Comment                                                                                                                                                                                                                                                                                                 | Method                                                                    | Population       | Sample                     | Reference                                                                                                                                                                                                                                                                                                                                                                                                                                                    |
|--------------------------------------|-----------------------------------------|--------------------------------------|---------------------------------------|----------------------|------------|--------------|---------------------------------------------------------------------------------------------------------------------------------------------------------------------------------------------------------------------------------------------------------------------------------------------------------|---------------------------------------------------------------------------|------------------|----------------------------|--------------------------------------------------------------------------------------------------------------------------------------------------------------------------------------------------------------------------------------------------------------------------------------------------------------------------------------------------------------------------------------------------------------------------------------------------------------|
| HLA-DQB1 individuals with the allele | DQB1*03:02                              | 2.76                                 | 0.004                                 | DQB1*03:01, 06       | 0.21, 0.30 | 0.007, 0.013 |                                                                                                                                                                                                                                                                                                         |                                                                           |                  |                            | P, Tron F, Makni S, Masmoudi H; Franco-Tunisian Group for Survey and Research on Pemphigus. Tunisian endemic pemphigus foliaceus is associated with the HLA-DR3 gene: anti-desmoglein 1 antibody-positive healthy subjects bear protective alleles. Br J Dermatol. 2009 Sep;161(3):522-7.                                                                                                                                                                    |
| HLA-DRB1 individuals with the allele | DRB1*04, 04:02, 04:04                   | 2.44, ni, ni                         | 0.02, 0.01, 0.03                      | DRB1*04:05           | ni         | 0.0002       | 95% CI not informed. DRB1*11 was non-significantly decreased among patients (OR=0.23, p=0.11). Only for groups DRB1*03 and 04 high resolution typing was informed.                                                                                                                                      | PCR-SSP                                                                   | Tunisian (north) | PF(sporadic): 40; C: 140   | Abida O, Zitouni M, Kallel-Sellami M, Mahfoudh N, Kammoun A, Ben Ayed M, Masmoudi A, Mokni M, Fezzaa B, Ben Osman A, Kammoun MR, Turki H, Makni H, Gilbert D, Joly P, Tron F, Makni S, Masmoudi H; Franco-Tunisian Group for Survey and Research on Pemphigus. Tunisian endemic pemphigus foliaceus is associated with the HLA-DR3 gene: anti-desmoglein 1 antibody-positive healthy subjects bear protective alleles. Br J Dermatol. 2009 Sep;161(3):522-7. |
| HLA-DQB1 individuals with the allele |                                         |                                      |                                       | DQB1*03:01           | 0.17       | 0.007        |                                                                                                                                                                                                                                                                                                         |                                                                           |                  |                            |                                                                                                                                                                                                                                                                                                                                                                                                                                                              |
| HLA-DRB1                             | DRB1*01:02, 04, 04:02, 04:06, 14, 14:04 | 3.84, 2.71, 8.89, 20.75, 2.90, 27.65 | 0.04, 0.01, 0.02, 0.003, 0.04, 0.0008 |                      |            |              | 95% CI not informed. DRB1*03 and 07 non-significantly decreased among patients (OR=0.25 p=0.094; OR=0.48 p=0.229). Only for groups DRB1*01, 04 and 14 high resolution (4-digit) typing was informed.                                                                                                    | PCR-SSO for low resolution, plus PCR-SSP and PCR-RFLP for 4-digit typings | French           | PF(sporadic): 31, C: 84    | Martel P, Gilbert D, Busson M, Loiseau P, Lepage V, Drouot L, Delaporte E, Prost C, Joly P, Charron D, Tron F. Epistasis between DSG1 and HLA class II genes in pemphigus foliaceus. Genes Immun. 2002 Jun;3(4):205-10.                                                                                                                                                                                                                                      |
| HLA-DQB1                             | DQB1*03:02                              | 3.00                                 | 0.02                                  | DQB1*02(02:01+02:02) | 0.32       | 0.02         | DQB1*05:03 non-significantly increased among patients (OR=2.55, p=0.08).                                                                                                                                                                                                                                |                                                                           |                  | PF(sporadic): 30, C: 64    |                                                                                                                                                                                                                                                                                                                                                                                                                                                              |
| HLA-DRB1                             | DRB1*04:06                              | 5.58                                 | 7.4x10-13                             | ni                   |            |              | HLA genotypes were imputed from GWAS data and validated by NGS. 95% CI not informed.                                                                                                                                                                                                                    | GWAS (microarray) and NGS-based HLA typing                                | Chinese (Han)    | PF(sporadic): 159; C: 2493 | Sun Y, Liu H, Yang B, Wang C, Foo JN, Bao F, Irwanto A, Yu G, Fu X, Wang Z, You J, Liu J, Zhou G, Liu J, Zhang F. Investigation of the predisposing factor of pemphigus and its clinical subtype through a genome-wide association and next generation sequence analysis. J Eur Acad Dermatol Venereol. 2019 Feb;33(2):410-415.                                                                                                                              |
| HLA-DQB1                             | DQB1*05:03                              | 5.64                                 | 4.8x10-17                             | ni                   |            |              |                                                                                                                                                                                                                                                                                                         |                                                                           |                  |                            |                                                                                                                                                                                                                                                                                                                                                                                                                                                              |
| HLA-DRB1                             | DRB1*04:06, 14:05                       | 4.28, 6.15                           | 1.6x10-5, 1.6x10-5                    | none                 |            |              | GWAS results for HLA were are replicated in a 2nd sample of 32 patients and 604 controls. Groups DRB1*04 and 14 were significantly increased among patients. After conditional analysis, authors concluded that only associations with DQB1*05:03 and DQA1*01:01 were independent. 95% CI not informed. | GWAS (microarray)                                                         | Chinese (Han)    | PF(sporadic): 72; C: 501   | Zhang SY, Zhou XY, Zhou XL, Zhang Y, Deng Y, Liao F, Yang M, Xia XY, Zhou YH, Yin DD, Ojaswi P, Hou QQ, Wang L, Zhang DY, Xia DM, Deng YQ, Ding L, Liu HJ, Yan W, Li MM, Ma WT, Ma JJ, Yu Q, Liu B, Yang L, Zhang W, Shu Y, Xu H, Li W. Subtype-specific inherited predisposition to pemphigus in the Chinese population. Br J Dermatol. 2019 Apr;180(4):828-35.                                                                                             |
| HLA-DQA1                             | none                                    |                                      |                                       | DQA1*01:02           | 0.34       | 2x10-4       |                                                                                                                                                                                                                                                                                                         |                                                                           |                  |                            |                                                                                                                                                                                                                                                                                                                                                                                                                                                              |
| HLA-DQB1                             | DQB1*03:02, 05:03                       | 3.35, 4.63                           | 7.2x10-6, 2.4x10-8                    | none                 |            |              |                                                                                                                                                                                                                                                                                                         |                                                                           |                  |                            |                                                                                                                                                                                                                                                                                                                                                                                                                                                              |

In red: unique associations, not reported in other populations or studies.

P: patients; C: controls; na: not analyzed; ni: not informed;

PCR-SSO: polymerase chain reaction + sequence-specific oligonucleotides; PCR-SSP: PCR with sequence-specific primers; PCR-RFLP: PCR + restriction fragment length polymorphism; GWAS: genome-wide association study; NGS: next-generation sequencing
